# Supplementary material for: The new implementation of a computationally efficient modeling tool (STOPS v1.5) into CMAQ v5.0.2 and its application for a more accurate prediction of Asian dust
Source: Copernicus journal article supplement (doi:10.5194/gmd-2016-180), 2016-07-21
Supplement: Supplementary file 1 [file gmd-2016-180-supplement.pdf]

# The new implementation of a computationally efficient modeling tool (STOPS v1.5) into CMAQ v5.0.2 and its application for a more accurate prediction of Asian dust

5 Wonbae Jeon<sup>1</sup>, Yunsoo Choi<sup>1\*</sup>, Peter Percell<sup>1</sup>, Amir Hossein Souri<sup>1</sup>, Chang-Keun Song<sup>2</sup>, Soon-Tae Kim<sup>3</sup>, and Jhoon Kim<sup>4</sup>

<sup>1</sup>Department of Earth and Atmospheric Sciences, University of Houston, 312 Science & Research Building 1, Houston, TX 77204, USA

10 <sup>2</sup>National Institute of Environmental Research, Incheon, Republic of Korea

<sup>3</sup>Division of Environmental Engineering, Ajou University, Suwon, Republic of Korea

<sup>4</sup>Department of Atmosphere Sciences, Yonsei University, Seoul, Republic of Korea

Correspondence to: Yunsoo Choi (ychoi6@uh.edu)

## 15 **Supplements**

Table S1 is a supplement for the description of difference between the simulated friction velocity and threshold values in the in-line dust module in CMAQ in Sect. 3.1 in the manuscript.

20 Figure S1 is a supplement for the description of consistency between CMAQ- and STOPS-simulated results in Sect. 4.1 in the manuscript.

Figure S2 is a supplement for the description of difference between standard and alternative emissions used for STOPS simulation in Sect. 4.2.1 in the manuscript.

25

**Table S1.** The averaged friction velocity ( $u_*$ ) in three land cover categories and threshold friction velocity values ( $u_{*ti,j}$ ) for each land cover category used in CMAQ\_Dust simulation.

| Land Cover Categories        | $u_*$ | $u_{*ti,j}$ (CMAQ_Dust) |
|------------------------------|-------|-------------------------|
| Shrubland                    | 0.23  | 1.54                    |
| Mixed Shrubland-Grassland    | 0.16  | 0.55                    |
| Barren or Sparsely vegetated | 0.18  | 0.65                    |

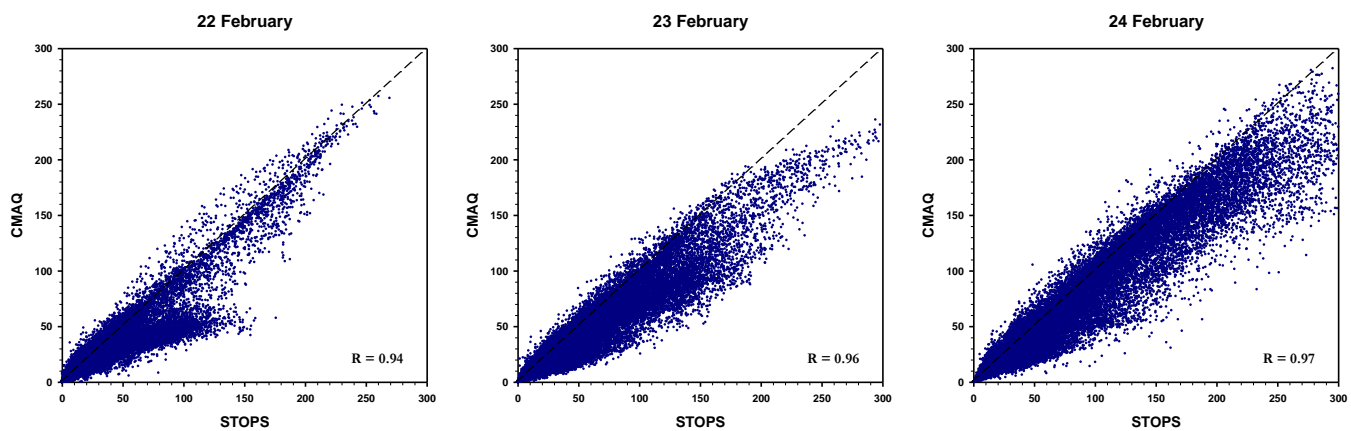

**Figure S1.** Scatter plots between STOPS- and CMAQ-simulated  $PM_{10}$  concentrations during the Asian dust events. The correlation coefficients (R) appear in the bottom-right of each plot.

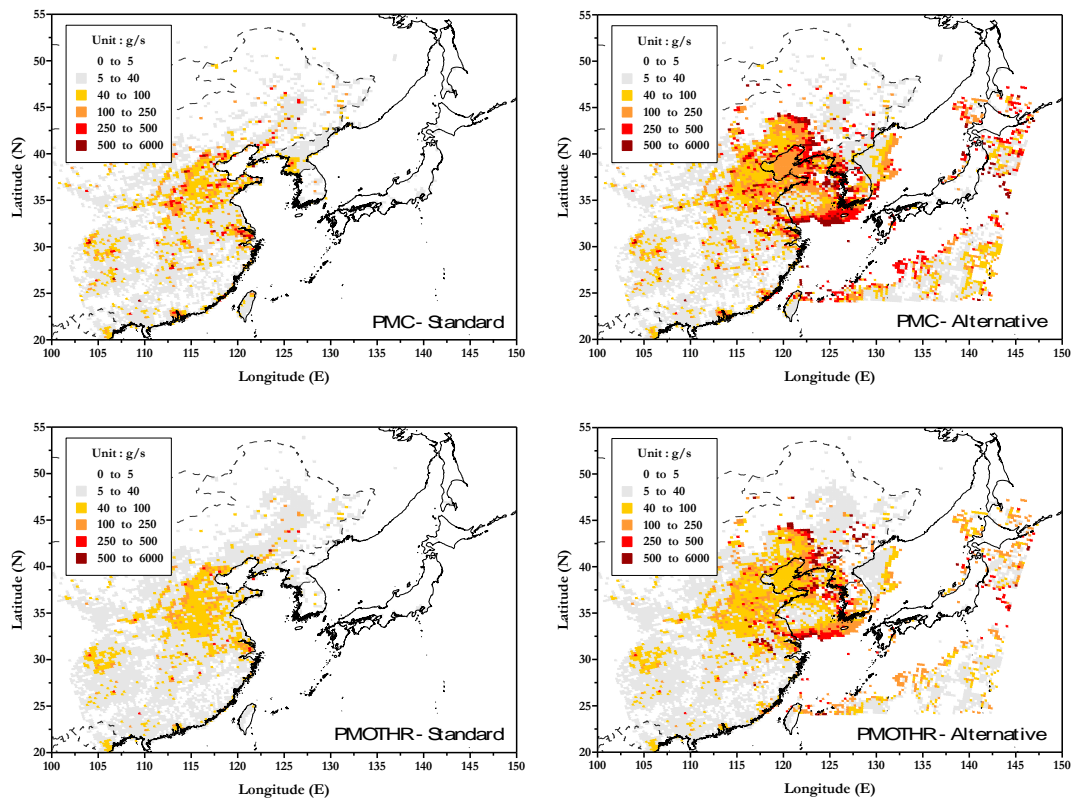

**Figure S2.** Difference between the emissions rates (grams second<sup>-1</sup>) of standard and alternative emissions (to represent enhanced GOCI AOD) data. The PMC and PMOTHR denote coarse and unspeciated fine particles, respectively.
